# Supplementary material
Source: PubMed Central journal article supplement (PMC3690309)
Supplement: NIHMS453158-supplement-01.pdf [file NIHMS453158-supplement-01.pdf]

Online Appendix A. *Characteristics of the United Kingdom, Norway, and Italy*

|                       | <b>Cancer Statistics</b>                                                                                                                                                                                                                                                                                                       | <b>Healthcare System</b>                                                                                                                                                                                                                                                                                                                                                                                         | <b>Key Achievements in Policy and Research Support</b>                                                                                                                                                                                                                                                                                                                                                                                                                                                                                                                                                                                                                                                                                                                                                                                                                                                                               |
|-----------------------|--------------------------------------------------------------------------------------------------------------------------------------------------------------------------------------------------------------------------------------------------------------------------------------------------------------------------------|------------------------------------------------------------------------------------------------------------------------------------------------------------------------------------------------------------------------------------------------------------------------------------------------------------------------------------------------------------------------------------------------------------------|--------------------------------------------------------------------------------------------------------------------------------------------------------------------------------------------------------------------------------------------------------------------------------------------------------------------------------------------------------------------------------------------------------------------------------------------------------------------------------------------------------------------------------------------------------------------------------------------------------------------------------------------------------------------------------------------------------------------------------------------------------------------------------------------------------------------------------------------------------------------------------------------------------------------------------------|
| <b>United Kingdom</b> | <ul style="list-style-type: none"> <li>Population based cancer statistics are available through 11 cancer registries, each covering populations of between approximately 1.65 and 13.8 million people (<a href="http://www.ukacr.org/registration-organisation">http://www.ukacr.org/registration-organisation</a>)</li> </ul> | <ul style="list-style-type: none"> <li>Healthcare is largely provided free of charge by the welfare state, through the National Health Service (NHS), at the time and point of need</li> <li>Cancer follow-up care occurs in hospital, community or primary care settings. The duration and intensity of hospital follow-up has been inconsistent and variable and not always robustly evidence-based</li> </ul> | <ul style="list-style-type: none"> <li>The Government's Cancer Reform Strategy identified key priorities including the need for a greater focus on survivorship (2007)</li> <li>The <i>National Cancer Survivor Initiative</i> (2010) was established to enhance cancer survivor care, and promote epidemiologic health services research in cancer survivorship</li> <li><i>Improving Outcomes: A strategy for cancer</i> (<a href="http://www.dh.gov.uk/prod_consum_dh/groups/dh_digitalassets/documents/digitalasset/dh_123394.pdf">http://www.dh.gov.uk/prod_consum_dh/groups/dh_digitalassets/documents/digitalasset/dh_123394.pdf</a>) highlighted the national commitment to enhancing care for survivors (2011)</li> <li>The Department of Health committed significant resources to cancer data collection through the <i>NCIN</i> (2011) and the <i>National Patient Reported Outcome Programme</i> (2012-2015)</li> </ul> |
| <b>Norway</b>         | <ul style="list-style-type: none"> <li>National registry with 100% coverage provides cancer incidence, mortality and prevalence in the population (5 million)</li> <li>Survivors can be linked to other data bases (e.g., the National Birth registry) through a unique personal identification number</li> </ul>              | <ul style="list-style-type: none"> <li>Cancer treatment and follow-up are free after the patient has paid annual expenses comparable to \$625</li> <li>Cancer follow-up is viewed as a shared responsibility between specialists and family doctors, with care shifting more to family doctors as years elapse since treatment</li> </ul>                                                                        | <ul style="list-style-type: none"> <li>The National Cancer Plan (NCP) identified palliation (1997) and awareness of late effects after and rehabilitation after cancer treatment (2004)</li> <li>The National Resource for Studies after Treatment of Cancer established to promote research, training, and knowledge dissemination (2005)</li> <li>The Directorate of Health expert group (2010) outlined physical and psychosocial needs of cancer survivors and proposed solutions to meet these needs</li> </ul>                                                                                                                                                                                                                                                                                                                                                                                                                 |
| <b>Italy</b>          | <ul style="list-style-type: none"> <li>29 cancer registries (ICR) that cover &lt;50% of Italy's population report incidence, mortality and survival</li> <li>There are also three diagnosis-specific registries and two regional childhood</li> </ul>                                                                          | <ul style="list-style-type: none"> <li>Cancer treatment and follow-up is free and includes necessary long-term follow-up</li> </ul>                                                                                                                                                                                                                                                                              | <ul style="list-style-type: none"> <li>The Italian National Cancer Plan (2010-2013) aims to: improve cancer follow-up and improve compliance with cancer registries</li> <li>National Multisite Research Program on Cancer Survivors funded to investigate the physical, psychological, and social sequelae of adult long-term cancer survivors; to identify the potential actions to prevent cancer sequelae; and to develop a</li> </ul>                                                                                                                                                                                                                                                                                                                                                                                                                                                                                           |

|                          |                          |                                                              |
|--------------------------|--------------------------|--------------------------------------------------------------|
| <b>Cancer Statistics</b> | <b>Healthcare System</b> | <b>Key Achievements in Policy and Research Support</b>       |
| registries               |                          | rehabilitation plan to meet Italian cancers survivors' needs |
